# Supplementary material for: Iron selenide nanorods for light-activated anticancer and catalytic applications
Source: Royal Society of Chemistry journal article supplement (doi:10.1039/d2nj05094c), 2022-12-27
Supplement: d2nj05094c1.pdf [file d2nj05094c1.pdf]

## Supplementary Data

### Iron Selenide Nanorods for light-activated anticancer and catalytic applications

Tarun Mohan<sup>a</sup>, Jitender Kumar<sup>a</sup> and Indrajit Roy<sup>a\*</sup>

<sup>a</sup>Department of Chemistry, University of Delhi, Delhi-110007, India

\* Corresponding author. E-mail: indrajitroy11@gmail.com

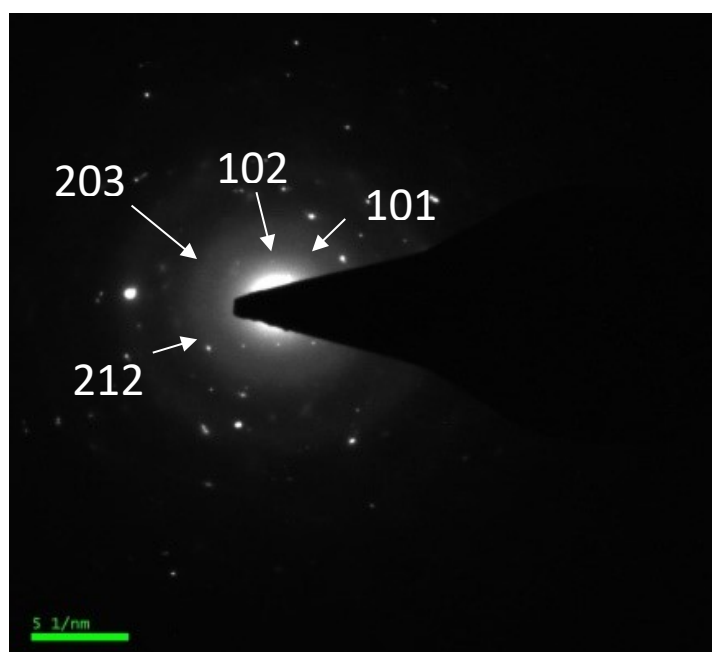

Figure S1: SAED pattern of the FeSe NRs, validating the XRD data.

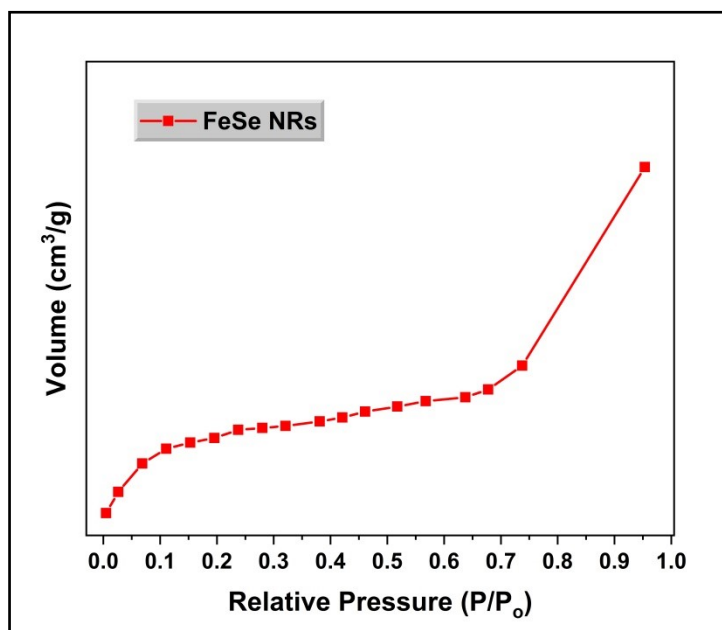

Figure S2: Nitrogen Adsorption Isotherm of FeSe NRs.

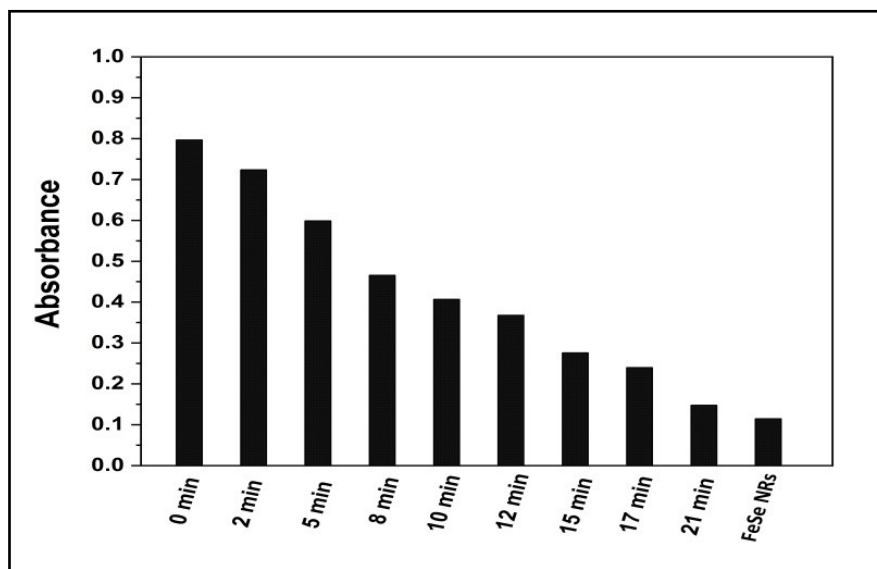

Figure S3: Decrease in absorbance value of MB dye with the time of laser irradiation.

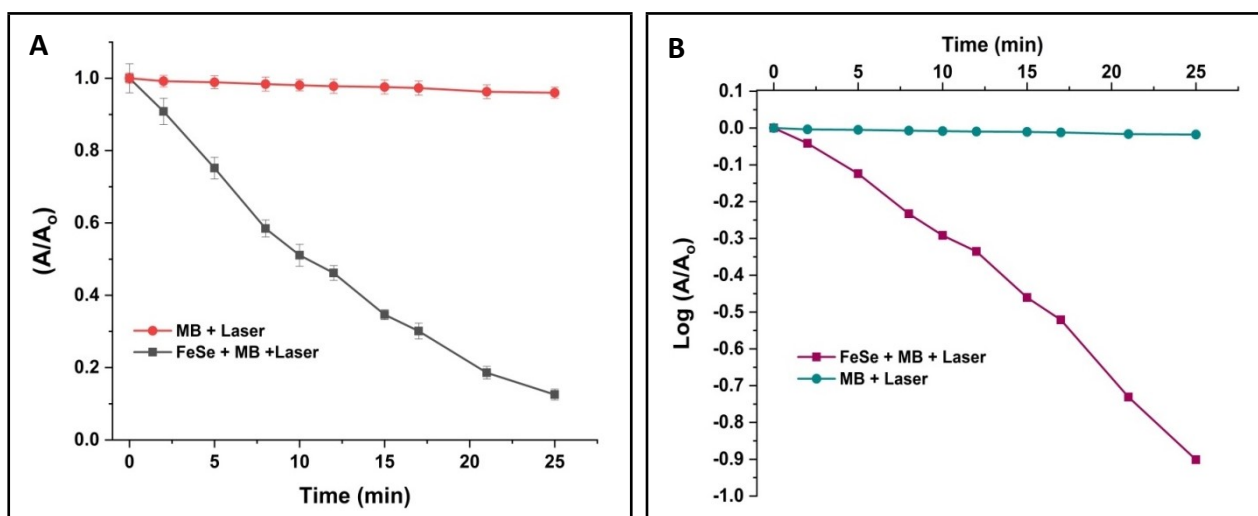

Figure S4: (A) Linear and (B) logarithmic calibration plot of the relative absorption intensity of MB dye, with and without FeSe NRs, upon laser irradiation as function of time.

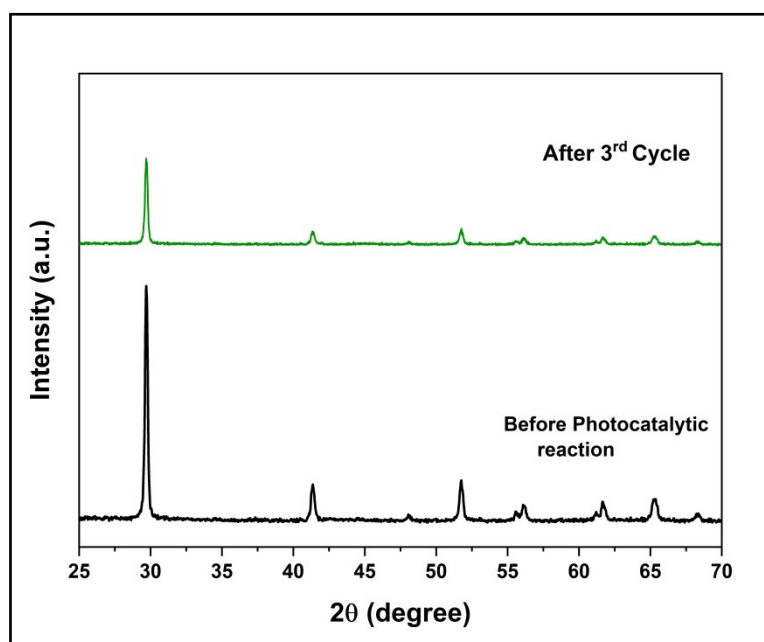

Figure S5: The XRD-pattern of recycled FeSe NRs.

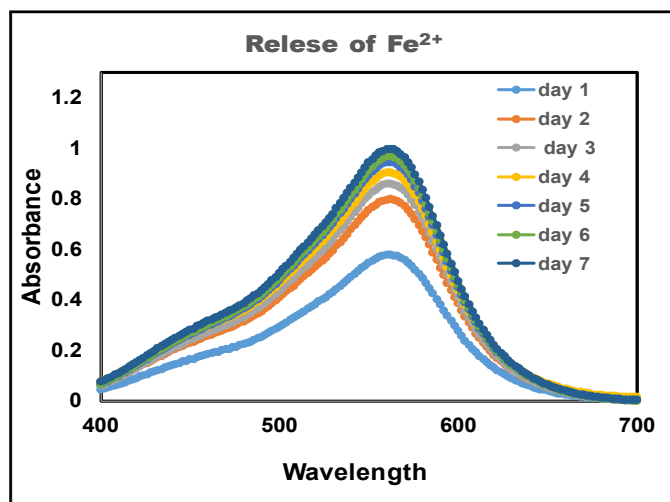

Figure S6: Absorbance spectrum of leached Fe<sup>2+</sup> ions with time.

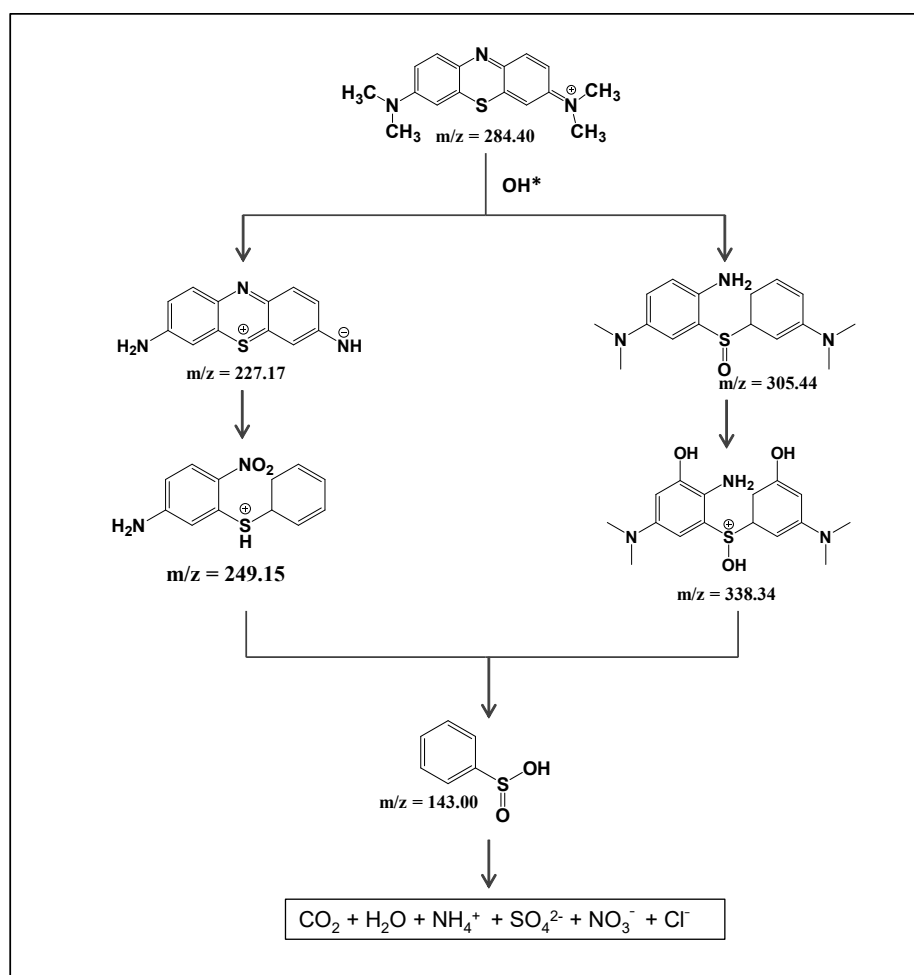

Figure S7: The possible degradation pathway of MB dye during photocatalysis.
